# Supplementary material
Source: ML conference proceedings conference paper supplement (https://proceedings.neurips.cc/paper_files/paper/2014/hash/dca5672ff3444c7e997aa9a2c4eb2094-Abstract.html)
Supplement: Supplementary file [file dca5672ff3444c7e997aa9a2c4eb2094-Supplemental.zip]

## A Appendix

### A.1 Proofs

#### A.1.1 Proof of Theorem 3.3

*Proof.* For simplicity, we first consider the case of symmetric PSD  $A$ . Let  $k^* = \text{rank } A$ . Consider  $X \in \mathbb{R}^{n \times k}$  with  $\|X_i\|_2 \leq 1$  and  $k > k^*$  such that  $\text{LRP}_k(X) = \text{tr}(X^\top A X)$  attains the optimal value of the SDP (this is possible in particular when  $k = n$ ). We want to transform  $X$  to the thinner  $X^* \in \mathbb{R}^{n \times k^*}$  that still satisfies the row norm constraints  $\|X_i^*\|_2 \leq 1$ . Let  $Q \in \mathbb{R}^{k \times k}$  be an orthonormal matrix ( $Q Q^\top = I_k$ ). Note that  $XQ$  still satisfies the row norm constraints (since each row of  $X_i$  just gets rotated). Thus, it suffices to find  $Q$  so that some columns of  $XQ$  fall into the null-space of  $A$  and can be discarded.

Suppose  $A \succeq 0$ . Let  $A = LL^\top$  for  $L \in \mathbb{R}^{n \times k^*}$  and let  $Y = L^\top X \in \mathbb{R}^{k^* \times k}$ . We can choose  $Q$  so that  $YQ \in \mathbb{R}^{k^* \times k}$  has at most  $k^*$  non-zero columns, i.e. take  $Q = [Q_{\text{basis}}, Q_{\text{null}}]$ , where  $Q_{\text{null}} \in \mathbb{R}^{k \times (k-k^*)}$  comprises the  $k - k^*$  columns such that  $YQ_{\text{null}} = 0$  and  $Q_{\text{basis}} \in \mathbb{R}^{k \times k^*}$  comprises the first  $k^*$  columns of  $Q$ . Obtaining such a  $Q$  is possible by taking an orthonormal basis of the null space of  $Y$  as the columns of  $Q_{\text{null}}$ , and taking an orthonormal basis of the  $k^*$ -dimensional row space of  $Y$  as the columns of  $Q_{\text{basis}}$ . Both bases can be obtained by applying the Gram-Schmidt process.

Now when we transform  $X$  by  $Q$  to get  $XQ = [XQ_{\text{basis}}, XQ_{\text{null}}]$ , we can drop the columns  $XQ_{\text{null}}$  since  $0 = YQ_{\text{null}} = L^\top XQ_{\text{null}}$ , thus removing  $XQ_{\text{null}}$  does not change the objective. Setting  $X^* = XQ_{\text{basis}} \in \mathbb{R}^{n \times k^*}$  gives that  $\text{LRP}_k(X^*) = \text{LRP}_k(X)$  and we get the desired rank reduction without changing the objective and while maintaining satisfiability of the row norm constraints.

More generally if  $A$  is real symmetric (but not necessarily  $A \succeq 0$ ) then we can consider instead the factorization  $A = LR^\top$  where the columns of  $R$  are identical to the columns of  $L$  except possibly negated. Such a factorization is given by the eigendecomposition of a real symmetric matrix. In this case,  $Q$  still rotates both  $L$  and  $R$  correctly and the above argument follows in the same way.  $\square$

We remark that even more generally, if  $A = LU^\top$  for  $L, U \in \mathbb{R}^{n \times k^*}$  for  $n \geq k \geq 2k^*$ , then we can set  $Q_{\text{basis}}$  to be the basis of the row space of  $Y = [L^\top X; U^\top X] \in \mathbb{R}^{2k^* \times k}$ . Then the same argument still applies but we can only reduce the solution rank from  $k$  to  $2k^* = 2\text{rank}(A)$ .

#### A.1.2 Proof of Theorem 3.5

*Proof.* The proof relies on Grothendieck's identity: if  $u, v \in \mathbb{R}^k$  and  $g$  is drawn uniformly from the unit sphere  $\mathcal{S}^k$ , then

$$\mathbb{E} [\text{sign}(u^\top g) \text{sign}(v^\top g)] = \frac{2}{\pi} \arcsin(u^\top v). \quad (7)$$

Let  $Y = f(XX^\top) \in \mathbb{R}^{n \times n}$  be the elementwise application of the scalar function

$$f(t) = \frac{2}{\pi} \left( \arcsin(t) - \frac{t}{\gamma(k)} \right). \quad (8)$$

Lemma 1 in [13] shows that  $f(t)$  is a function of the *positive type* on  $\mathcal{S}^k$ , which by definition means that  $Y \succeq 0$  provided  $X_i \in \mathcal{S}^k$  for all  $i$ . The underlying theory is developed in [14].

For  $A, Y \succeq 0$  we have that  $\text{tr}(AY) \geq 0$ . Rearranging terms and applying Grothendieck's identity,

$$0 \leq \text{tr}(AY) = \text{tr} \left( A \frac{2}{\pi} \left( \arcsin(XX^\top) - \frac{XX^\top}{\gamma(k)} \right) \right) \quad (9)$$

$$\iff \text{tr} \left( A \frac{2}{\pi} \arcsin(XX^\top) \right) \geq \frac{2}{\pi \gamma(k)} \text{tr}(AXX^\top) \quad (10)$$

$$\iff \mathbb{E}[\text{IQP}(\text{rrd}(X))] \geq \frac{2}{\pi \gamma(k)} \text{LRP}_k(X), \quad (11)$$

as claimed.  $\square$

## A.2 MRF to IQP reduction

Using the shorthand  $\psi_{i;u} = \psi_i(u)$  and  $\theta_{ij;uv} = \theta_{i,j}(u, v)$ , the negative energy can be written as a sum of terms  $\psi_{i;1}x_i + \psi_{i;0}(1 - x_i)$  and of terms

$$\theta_{ij;11}x_ix_j + \theta_{ij;10}x_i(1 - x_j) + \theta_{ij;01}(1 - x_i)x_j + \theta_{ij;00}(1 - x_i)(1 - x_j) \quad (12)$$

for every  $i, j$ , *i.e.* negative energy is a quadratic form over  $\{0, 1\}^n$ , and finding its maximum is precisely the MAP problem. This quadratic form over can be written as  $x^\top Mx + \beta^\top x + \beta_0$ , where

$$M_{i,j} \stackrel{\text{def}}{=} \theta_{ij;11} + \theta_{ij;00} - \theta_{ij;10} - \theta_{ij;01} \quad \text{for } i < j \quad (13)$$

$$\beta_i \stackrel{\text{def}}{=} \psi_{i;1} - \psi_{i;0} + \sum_{j>i} (\theta_{ij;10} - \theta_{ij;00}) + \sum_{j<i} (\theta_{ji;01} - \theta_{ji;00}) \quad \text{for every } i \quad (14)$$

$$\beta_0 \stackrel{\text{def}}{=} \sum_i \psi_{i;0} + \sum_{i<j} \theta_{ij;00} \quad (15)$$

This in turn can be written more compactly as  $x^\top (M' + \text{diag}(\beta))x + \beta_0$ , where  $M' = (M + M^\top)/2$  is taken for symmetry. In summary, MAP in the MRF reduces to maximizing the term left of  $\beta_0$  (that which we can control), which is now in a form that differs from IQP only by the domain of  $x$ .

One can then reduce the problem from the  $x \in \{0, 1\}^n$  domain to  $x \in \{-1, 1\}^n$  by a linear change of variables. Given an IQP as in (1) with objective  $x^\top Ax$  over  $x \in \{0, 1\}^n$ , we can equivalently optimize  $[\frac{1}{2}(\tilde{x} + 1)]^\top A[\frac{1}{2}(\tilde{x} + 1)]$  over  $\tilde{x} \in \{-1, 1\}^n$ . This reduction introduces cross-terms. Define

$$b \stackrel{\text{def}}{=} \mathbf{1}^\top A + A\mathbf{1} = 2A\mathbf{1} \in \mathbb{R}^n \quad b_0 \stackrel{\text{def}}{=} \mathbf{1}^\top A\mathbf{1} = \frac{1}{2}\mathbf{1}^\top b \in \mathbb{R}^n \quad (16)$$

Now, optimizing over  $x \in \{-1, 1\}^n$ , we can fold  $b$  and  $b_0$  into  $A$  by introducing a single auxiliary variable  $x_0$  (so the new domain is  $x' = (x_0, x)$ ) and augmenting  $A$  to

$$A' = \frac{1}{4} \begin{bmatrix} b_0 & \frac{1}{2}b^\top \\ \frac{1}{2}b & A \end{bmatrix}. \quad (17)$$

The variable  $x_0$  must be constrained to 1, but in practice such a constraint can be ignored up until we output a final solution, because negating all of  $x$  has no effect on the IQP objective.

## A.3 Additional figures

Figure 4 shows empirical histograms of objectives of random roundings from an  $\text{LRP}_k$  solution.

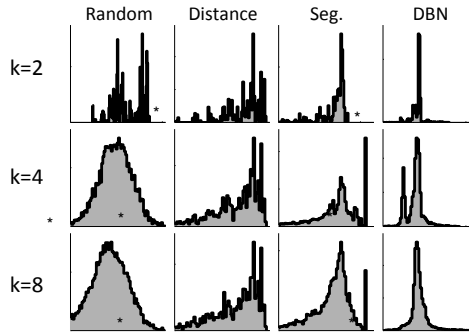

Figure 4: Distribution of the value of random roundings across problem instances and ranks. From top to bottom, rows vary across  $k = 2, 4, 8$ . From left to right, columns show: (1) random  $A$ ; (2) a pairwise distance matrix formed by MNIST digits 4 and 9; (3) an instance from **seg**; (4) an instance from **dbn**. The range of the x-axis is identical in each column.
